# Supplementary material
Source: publisher figshare collection journal article supplement (https://future-science-group.figshare.com/ndownloader/files/30751879)
Supplement: Supplementary file 1 [file 30751879]

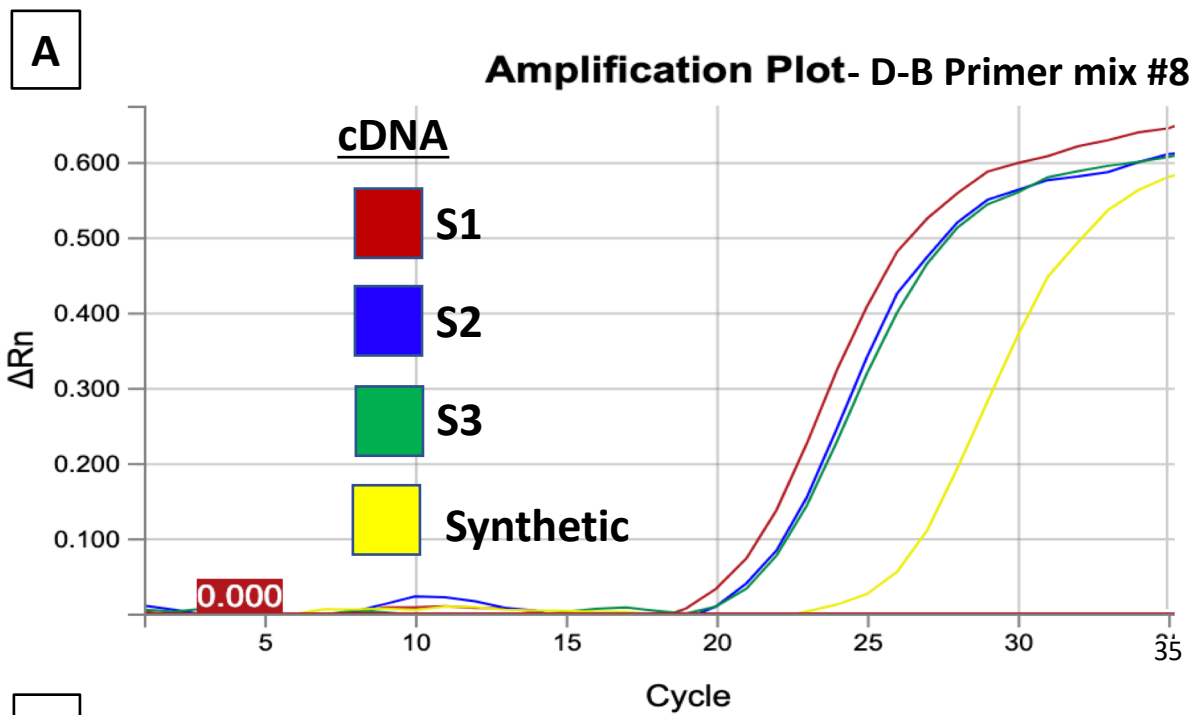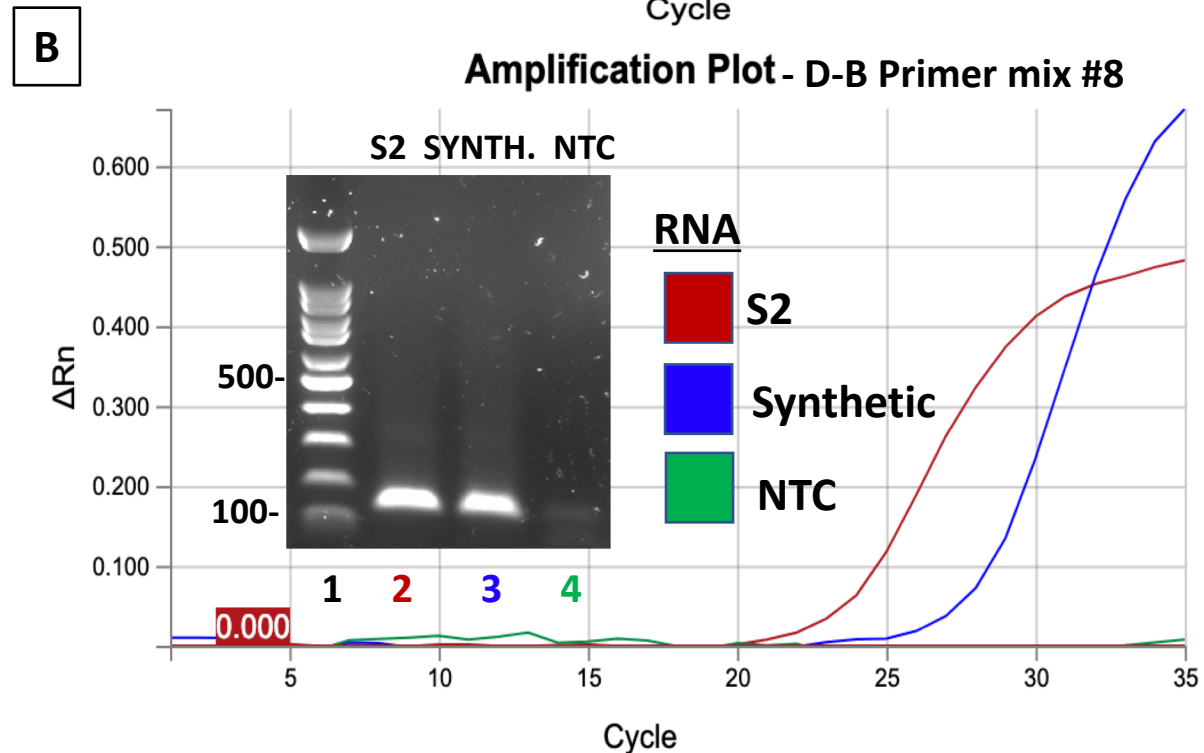

**Figure S7**

**Using D-B primers to detect SARS-COV-2 virus in nasopharyngeal samples using *fast conditions*.** (A) cDNAs from reverse-transcribed RNA extracted from nasopharyngeal swabs of 3 patients (S1, S2, S3) as well as SARS-COV-2 synthetic RNA “N” were subjected to qPCR using primer mix #8 and VIC-TqM probe #12 and TqM fast kit+ UDG. (B) one-tube RT-qPCR using template RNA extracted from nasopharyngeal swabs of positive patient S2 as well as SARS-COV-2 synthetic RNA “N”, TqM fast kit without UDG and iScript reverse-transcriptase. Insert- 1.5% agarose gel: lane 1- 100 bp ladder; lane 2- SARS-COV-2 synthetic RNA “N”. lane 3- RNA extracted from nasopharyngeal swabs of patient S2.
